# Supplementary material for: Are cause of death data for Shanghai fit for purpose? A retrospective study of medical records
Source: HighWire-hosted journal article supplement (doi:10.1136/bmjopen-2020-046185), 2022-02-01
Supplement: bmjopen-2020-046185supp002_data_supplement.pdf [file bmjopen-2020-046185supp002_data_supplement.pdf]

Supplementary Table 1. Leading ICD UCOD of garbage codes in original death certificates (%), all facilities

|    | ICD name                                                 | N   | %    |
|----|----------------------------------------------------------|-----|------|
| 1  | Essential (primary) hypertension                         | 147 | 27.7 |
| 2  | Pneumonia, unspecified organism                          | 107 | 20.2 |
| 3  | Ill-defined and unknown cause of mortality               | 48  | 9.1  |
| 4  | Heart failure, unspecified                               | 34  | 6.4  |
| 5  | Respiratory failure, unspecified                         | 27  | 5.1  |
| 6  | Unspecified kidney failure                               | 10  | 1.9  |
| 7  | Other and unspecified disorders of circulatory system    | 9   | 1.7  |
| 8  | Sepsis, unspecified organism                             | 8   | 1.5  |
| 9  | Sudden cardiac death, so described                       | 8   | 1.5  |
| 10 | Stroke, not specified as haemorrhage or infarction       | 7   | 1.3  |
| 11 | Neoplasm of uncertain behavior, unspecified              | 6   | 1.1  |
| 12 | Gastrointestinal hemorrhage, unspecified                 | 6   | 1.1  |
| 13 | Sequelae of other accidents                              | 6   | 1.1  |
| 14 | Compression of brain                                     | 5   | 0.9  |
| 15 | Malignant neoplasm of intestinal tract, part unspecified | 4   | 0.8  |
|    | Total                                                    | 432 |      |

Supplementary Table 2. Top 15 UCODs (%) by source, Shanghai, 2017

|    | Original UCOD                              | %    | Routine UCOD                          | %    | MRR UCOD (Gold standard)                               | %    |
|----|--------------------------------------------|------|---------------------------------------|------|--------------------------------------------------------|------|
| 1  | Garbage Code                               | 31.0 | Ischemic heart disease                | 20.4 | Ischemic heart disease                                 | 21.0 |
| 2  | Ischemic heart disease                     | 12.4 | Ischemic stroke                       | 13.4 | Ischemic stroke                                        | 13.3 |
| 3  | Tracheal, bronchus, and lung cancer        | 8.6  | Tracheal, bronchus, and lung cancer   | 10.0 | Tracheal, bronchus, and lung cancer                    | 10.2 |
| 4  | Chronic obstructive pulmonary disease      | 7.3  | Chronic obstructive pulmonary disease | 8.7  | Chronic obstructive pulmonary disease                  | 9.6  |
| 5  | Stomach cancer                             | 6.2  | Stomach cancer                        | 7.2  | Stomach cancer                                         | 7.5  |
| 6  | Ischemic stroke                            | 5.9  | Colon and rectum cancer               | 6.7  | Intracerebral hemorrhage                               | 6.8  |
| 7  | Colon and rectum cancer                    | 5.7  | Intracerebral hemorrhage              | 6.7  | Colon and rectum cancer                                | 6.7  |
| 8  | Pancreatic cancer                          | 4.3  | Liver cancer                          | 5.6  | Liver cancer                                           | 5.8  |
| 9  | Intracerebral hemorrhage                   | 3.8  | Pancreatic cancer                     | 5.2  | Pancreatic cancer                                      | 5.4  |
| 10 | Liver cancer                               | 3.6  | Diabetes mellitus type 2              | 3.3  | Diabetes mellitus type 2                               | 3.3  |
| 11 | Diabetes mellitus type 2                   | 2.0  | Garbage Code                          | 2.3  | Falls                                                  | 2.2  |
| 12 | Cirrhosis and other chronic liver diseases | 1.5  | Breast cancer                         | 1.7  | Breast cancer                                          | 1.6  |
| 13 | Breast cancer                              | 1.5  | Falls                                 | 1.5  | Chronic kidney disease due to diabetes mellitus type 2 | 1.4  |
| 14 | Esophageal cancer                          | 1.1  | Esophageal cancer                     | 1.3  | Esophageal cancer                                      | 1.3  |
| 15 | Atrial fibrillation and flutter            | 0.6  | Prostate cancer                       | 1.1  | Prostate cancer                                        | 1.0  |

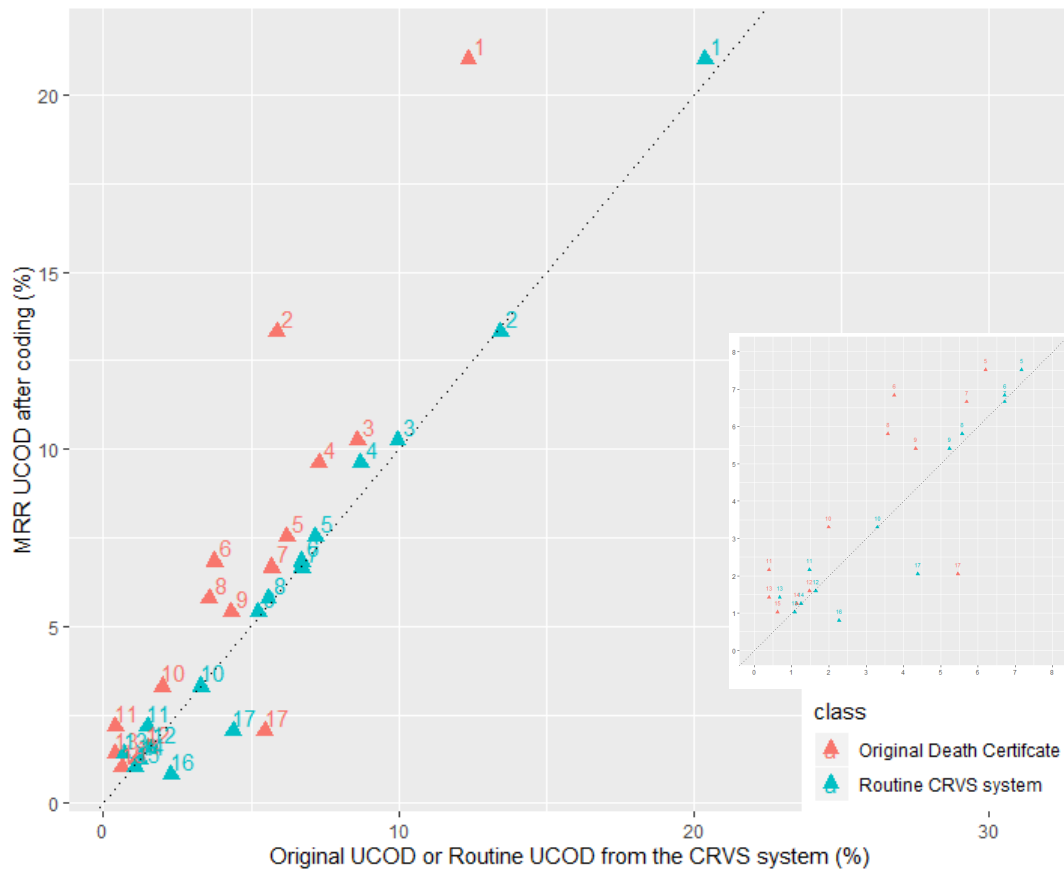

| Rank | Disease name                          | Rank | Disease name                                           |
|------|---------------------------------------|------|--------------------------------------------------------|
| 1    | Ischemic heart disease                | 10   | Diabetes mellitus type 2                               |
| 2    | Ischemic stroke                       | 11   | Falls                                                  |
| 3    | Tracheal, bronchus, and lung cancer   | 12   | Breast cancer                                          |
| 4    | Chronic obstructive pulmonary disease | 13   | Chronic kidney disease due to diabetes mellitus type 2 |
| 5    | Stomach cancer                        | 14   | Esophageal cancer                                      |
| 6    | Intracerebral hemorrhage              | 15   | Prostate cancer                                        |
| 7    | Colon and rectum cancer               | 16   | Garbage Code                                           |
| 8    | Liver cancer                          | 17   | All other diseases                                     |
| 9    | Pancreatic cancer                     |      |                                                        |

Supplementary Fig 1. CSMF of original UCOD or routine UCOD versus MRR

UCOD(%)

Supplementary Table 3. The severity classification of original UCODS which were assigned as garbage codes.

| Rank | garbage codes of original UCODs | ICD-name                                        | level 1 | level 2 | level 3 | level 4 | Total |
|------|---------------------------------|-------------------------------------------------|---------|---------|---------|---------|-------|
| 1    | R99                             | Ill-defined and unknown cause of mortality      | 48      | 0       | 0       | 0       | 48    |
| 2    | I50.9                           | Heart failure, unspecified                      | 34      | 0       | 0       | 0       | 34    |
| 3    | J96.9                           | Respiratory failure, unspecified                | 27      | 0       | 0       | 0       | 27    |
| 4    | N19                             | Unspecified kidney failure                      | 10      | 0       | 0       | 0       | 10    |
| 5    | A41.9                           | Sepsis, unspecified organism                    | 8       | 0       | 0       | 0       | 8     |
| 6    | I46.1                           | Sudden cardiac death, so described              | 8       | 0       | 0       | 0       | 8     |
| 7    | K72.9                           | Hepatic failure, unspecified                    | 8       | 0       | 0       | 0       | 8     |
| 8    | J69.0                           | Pneumonitis due to inhalation of food and vomit | 4       | 0       | 0       | 0       | 4     |
| 9    | E14.9                           | Unspec DM without complication                  | 3       | 0       | 0       | 0       | 3     |
| 10   | I26.9                           | Pulmonary embolism without acute cor pulmonale  | 3       | 0       | 0       | 0       | 3     |
| 11   | R57.0                           | Cardiogenic shock                               | 3       | 0       | 0       | 0       | 3     |
| 12   | R57.1                           | Hypovolemic shock                               | 3       | 0       | 0       | 0       | 3     |
| 13   | D64.9                           | Anemia, unspecified                             | 2       | 0       | 0       | 0       | 2     |
| 14   | G91.9                           | Hydrocephalus, unspecified                      | 2       | 0       | 0       | 0       | 2     |
| 15   | I46.9                           | Cardiac arrest, cause unspecified               | 2       | 0       | 0       | 0       | 2     |
| 16   | R57.8                           | Other shock                                     | 2       | 0       | 0       | 0       | 2     |

|    |       |                                                                            |   |     |   |   |     |
|----|-------|----------------------------------------------------------------------------|---|-----|---|---|-----|
| 17 | D64   | Other anemias                                                              | 1 | 0   | 0 | 0 | 1   |
| 18 | E14.2 | Unspecified DM with renal complication                                     | 1 | 0   | 0 | 0 | 1   |
| 19 | E87.1 | Hypo-osmolality and hyponatremia                                           | 1 | 0   | 0 | 0 | 1   |
| 20 | E87.2 | Acidosis                                                                   | 1 | 0   | 0 | 0 | 1   |
| 21 | E87.8 | Other disorders of electrolyte and fluid balance, not elsewhere classified | 1 | 0   | 0 | 0 | 1   |
| 22 | I50.1 | Left ventricular failure                                                   | 1 | 0   | 0 | 0 | 1   |
| 23 | J86.9 | Pyothorax without fistula                                                  | 1 | 0   | 0 | 0 | 1   |
| 24 | J96   | Respiratory failure, not elsewhere classified                              | 1 | 0   | 0 | 0 | 1   |
| 25 | J98.1 | Pulmonary collapse                                                         | 1 | 0   | 0 | 0 | 1   |
| 26 | K65.9 | Peritonitis, unspecified                                                   | 1 | 0   | 0 | 0 | 1   |
| 27 | M84.4 | Pathological fracture, not elsewhere classified                            | 1 | 0   | 0 | 0 | 1   |
| 28 | N17.9 | Acute kidney failure, unspecified                                          | 1 | 0   | 0 | 0 | 1   |
| 29 | R54   | Age-related physical debility                                              | 1 | 0   | 0 | 0 | 1   |
| 30 | R57   | Shock, not elsewhere classified                                            | 1 | 0   | 0 | 0 | 1   |
| 31 | R57.9 | Shock, unspecified                                                         | 1 | 0   | 0 | 0 | 1   |
| 32 | R79.8 | Other specified abnormal findings of blood chemistry                       | 1 | 0   | 0 | 0 | 1   |
| 33 | R91   | Abnormal findings on diagnostic imaging of lung                            | 1 | 0   | 0 | 0 | 1   |
| 34 | R93.1 | Abnormal findings on diagnostic imaging of heart and coronary circulation  | 1 | 0   | 0 | 0 | 1   |
| 35 | R96.0 | Instantaneous death                                                        | 1 | 0   | 0 | 0 | 1   |
| 36 | Z99   | Dependence on enabling machines and devices, not elsewhere classified      | 1 | 0   | 0 | 0 | 1   |
| 37 | I10   | Essential (primary) hypertension                                           | 0 | 147 | 0 | 0 | 147 |
| 38 | Y86   | Sequelae of other accidents                                                | 0 | 6   | 0 | 0 | 6   |
| 39 | I27.9 | Pulmonary heart disease, unspecified                                       | 0 | 4   | 0 | 0 | 4   |
| 40 | J94.8 | Other specified pleural conditions                                         | 0 | 4   | 0 | 0 | 4   |
| 41 | S72.0 | Fracture of neck of femur                                                  | 0 | 3   | 0 | 0 | 3   |

|    |       |                                                                     |   |   |   |   |   |
|----|-------|---------------------------------------------------------------------|---|---|---|---|---|
| 42 | S06.5 | Traumatic subdural haemorrhage                                      | 0 | 2 | 0 | 0 | 2 |
| 43 | I74.9 | Embolism and thrombosis of unspecified artery                       | 0 | 1 | 0 | 0 | 1 |
| 44 | J81   | Pulmonary edema                                                     | 0 | 1 | 0 | 0 | 1 |
| 45 | J90   | Pleural effusion, not elsewhere classified                          | 0 | 1 | 0 | 0 | 1 |
| 46 | J94.1 | Fibrothorax                                                         | 0 | 1 | 0 | 0 | 1 |
| 47 | R04.2 | Hemoptysis                                                          | 0 | 1 | 0 | 0 | 1 |
| 48 | R09.2 | Respiratory arrest                                                  | 0 | 1 | 0 | 0 | 1 |
| 49 | R18   | Ascites                                                             | 0 | 1 | 0 | 0 | 1 |
| 50 | S06.3 | Focal brain injury                                                  | 0 | 1 | 0 | 0 | 1 |
| 51 | S06.6 | Traumatic subarachnoid haemorrhage                                  | 0 | 1 | 0 | 0 | 1 |
| 52 | S06.7 | Intracranial injury with prolonged coma                             | 0 | 1 | 0 | 0 | 1 |
| 53 | S06.9 | Intracranial injury, unspecified                                    | 0 | 1 | 0 | 0 | 1 |
| 54 | S22.3 | Fracture of one rib                                                 | 0 | 1 | 0 | 0 | 1 |
| 55 | S32.0 | Fracture of lumbar vertebra                                         | 0 | 1 | 0 | 0 | 1 |
| 56 | S72.1 | Pertrochanteric fracture                                            | 0 | 1 | 0 | 0 | 1 |
| 57 | S72.8 | Fractures of other parts of femur                                   | 0 | 1 | 0 | 0 | 1 |
| 58 | S72.9 | Fracture of femur, part unspecified                                 | 0 | 1 | 0 | 0 | 1 |
| 59 | T17.9 | Foreign body in respiratory tract, part unspecified                 | 0 | 1 | 0 | 0 | 1 |
| 60 | T93.1 | Sequelae of fracture of femur                                       | 0 | 1 | 0 | 0 | 1 |
| 61 | X59.9 | Exposure to unspecified factor causing other and unspecified injury | 0 | 1 | 0 | 0 | 1 |
| 62 | I99   | Other and unspecified disorders of circulatory system               | 0 | 0 | 9 | 0 | 9 |
| 63 | D48.9 | Neoplasm of uncertain behavior, unspecified                         | 0 | 0 | 6 | 0 | 6 |
| 64 | K92.2 | Gastrointestinal hemorrhage, unspecified                            | 0 | 0 | 6 | 0 | 6 |
| 65 | G93.5 | Compression of brain                                                | 0 | 0 | 5 | 0 | 5 |
| 66 | C26.0 | Malignant neoplasm of intestinal tract, part unspecified            | 0 | 0 | 4 | 0 | 4 |

|          |       |                                                                        |            |            |          |            |     |
|----------|-------|------------------------------------------------------------------------|------------|------------|----------|------------|-----|
| 67       | I49.9 | Cardiac arrhythmia, unspecified                                        | 0          | 0          | 4        | 0          | 4   |
| 68       | C80   | Malignant neoplasm without specification of site                       | 0          | 0          | 2        | 0          | 2   |
| 69       | I96.9 | -                                                                      | 0          | 0          | 2        | 0          | 2   |
| 70       | C76.2 | Malignant neoplasm of abdomen                                          | 0          | 0          | 1        | 0          | 1   |
| 71       | C78.7 | Secondary malignant neoplasm of liver and intrahepatic bile duct       | 0          | 0          | 1        | 0          | 1   |
| 72       | C78.8 | Secondary malignant neoplasm of other and unspecified digestive organs | 0          | 0          | 1        | 0          | 1   |
| 73       | C97   | Malignant neoplasms of independent (primary) multiple sites            | 0          | 0          | 1        | 0          | 1   |
| 74       | D37.7 | Other digestive organs                                                 | 0          | 0          | 1        | 0          | 1   |
| 75       | G93.4 | Other and unspecified encephalopathy                                   | 0          | 0          | 1        | 0          | 1   |
| 76       | G96.8 | Other specified disorders of central nervous system                    | 0          | 0          | 1        | 0          | 1   |
| 77       | I49.3 | Ventricular premature depolarization                                   | 0          | 0          | 1        | 0          | 1   |
| 78       | I49.5 | Sick sinus syndrome                                                    | 0          | 0          | 1        | 0          | 1   |
| 79       | I51.9 | Heart disease, unspecified                                             | 0          | 0          | 1        | 0          | 1   |
| 80       | J98.4 | Other disorders of lung                                                | 0          | 0          | 1        | 0          | 1   |
| 81       | N40   | Enlarged prostate                                                      | 0          | 0          | 1        | 0          | 1   |
| 82       | J18.9 | Pneumonia, unspecified organism                                        | 0          | 0          | 0        | 107        | 107 |
| 83       | I64   | Stroke, not specified as haemorrhage or infarction                     | 0          | 0          | 0        | 7          | 7   |
| 84       | I67.9 | Cerebrovascular disease, unspecified                                   | 0          | 0          | 0        | 2          | 2   |
| 85       | I42.0 | Dilated cardiomyopathy                                                 | 0          | 0          | 0        | 1          | 1   |
| 86       | I67.8 | Other specified cerebrovascular diseases                               | 0          | 0          | 0        | 1          | 1   |
| 87       | J15.9 | Unspecified bacterial pneumonia                                        | 0          | 0          | 0        | 1          | 1   |
| 88       | J18.8 | Other pneumonia, unspecified organism                                  | 0          | 0          | 0        | 1          | 1   |
| Total(%) |       |                                                                        | 187(34.50) | 185(34.13) | 50(9.23) | 120(22.14) | 542 |

Supplementary Table 4. Validation metrics comparing original UCOD or routine UCOD with MRR UCOD (top 15 specific UCOD) from tertiary hospitals

|    | Cause of Death                                         | Original UCOD |      |       |       |      | CSMF accuracy | Routine UCOD |      |       |      |      |               |
|----|--------------------------------------------------------|---------------|------|-------|-------|------|---------------|--------------|------|-------|------|------|---------------|
|    |                                                        | Sensitivity   | PPV  | Kappa | CCC   | CSMF |               | Sensitivity  | PPV  | Kappa | CCC  | CSMF | CSMF accuracy |
| 1  | Breast cancer                                          | 0.80          | 0.89 | 0.84  | 0.79  | 1.2  |               | 1.00         | 0.91 | 0.95  | 1.00 | 1.5  |               |
| 2  | Chronic kidney disease due to diabetes mellitus type 2 | 0.10          | 1.00 | 0.18  | 0.04  | 0.1  |               | 0.50         | 0.71 | 0.58  | 0.47 | 0.9  |               |
| 3  | Chronic obstructive pulmonary disease                  | 0.54          | 0.82 | 0.63  | 0.51  | 4.4  |               | 0.74         | 0.82 | 0.76  | 0.72 | 6.0  |               |
| 4  | Colon and rectum cancer                                | 0.76          | 0.98 | 0.85  | 0.75  | 6.1  |               | 0.90         | 0.93 | 0.91  | 0.89 | 7.6  |               |
| 5  | Diabetes mellitus type 2                               | 0.25          | 0.56 | 0.33  | 0.20  | 1.2  |               | 0.50         | 0.43 | 0.45  | 0.47 | 3.1  |               |
| 6  | Esophageal cancer                                      | 0.71          | 1.00 | 0.83  | 0.70  | 0.7  |               | 0.86         | 1.00 | 0.92  | 0.85 | 0.8  |               |
| 7  | Falls                                                  | 0.00          | ..   | 0.00  | -0.06 | 0.0  |               | 0.35         | 0.78 | 0.47  | 0.31 | 1.2  |               |
| 8  | Garbage Code                                           | 1.00          | 0.02 | 0.02  | 1.00  | 34.7 |               | 0.25         | 0.05 | 0.07  | 0.20 | 2.8  |               |
| 9  | Intracerebral hemorrhage                               | 0.54          | 0.89 | 0.66  | 0.51  | 3.7  |               | 0.89         | 0.85 | 0.86  | 0.88 | 6.4  |               |
| 10 | Ischemic heart disease                                 | 0.57          | 0.92 | 0.64  | 0.54  | 13.7 |               | 0.85         | 0.84 | 0.80  | 0.84 | 22.5 |               |
| 11 | Ischemic stroke                                        | 0.38          | 0.97 | 0.52  | 0.34  | 4.4  |               | 0.74         | 0.89 | 0.78  | 0.72 | 9.3  |               |
| 12 | Liver cancer                                           | 0.46          | 1.00 | 0.62  | 0.43  | 3.3  |               | 0.93         | 0.98 | 0.95  | 0.92 | 6.8  |               |
| 13 | Pancreatic cancer                                      | 0.64          | 0.94 | 0.75  | 0.62  | 4.3  |               | 0.89         | 0.93 | 0.91  | 0.89 | 6.0  |               |
| 14 | Prostate cancer                                        | 0.50          | 1.00 | 0.66  | 0.47  | 0.4  |               | 0.67         | 0.57 | 0.61  | 0.65 | 0.9  |               |
| 15 | Stomach cancer                                         | 0.68          | 1.00 | 0.79  | 0.66  | 5.6  |               | 0.90         | 0.98 | 0.94  | 0.90 | 7.6  |               |
| 16 | Tracheal, bronchus, and lung cancer                    | 0.72          | 0.98 | 0.81  | 0.70  | 7.8  |               | 0.95         | 0.97 | 0.96  | 0.95 | 10.5 |               |
| 17 | Others                                                 | 0.32          | 0.13 | 0.14  | 0.28  | 8.4  |               | 0.52         | 0.28 | 0.33  | 0.49 | 6.3  |               |
|    | Average                                                |               |      |       | 0.48  |      | 0.61          |              |      |       | 0.69 |      | 0.94          |



Supplementary Table 5. Validation metrics comparing original UCOD or routine UCOD with MRR UCOD (top 15 specific UCOD) from secondary hospital

|    | Cause of Death                                         | Original UCOD |      |       |      |      | Routine UCOD  |             |      |       |      |      |               |
|----|--------------------------------------------------------|---------------|------|-------|------|------|---------------|-------------|------|-------|------|------|---------------|
|    |                                                        | Sensitivity   | PPV  | Kappa | CCC  | CSMF | CSMF accuracy | Sensitivity | PPV  | Kappa | CCC  | CSMF | CSMF accuracy |
| 1  | Breast cancer                                          | 0.90          | 1.00 | 0.95  | 0.89 | 2.0  |               | 1.00        | 1.00 | 1.00  | 1.00 | 2.3  |               |
| 2  | Chronic kidney disease due to diabetes mellitus type 2 | 0.09          | 0.50 | 0.15  | 0.03 | 0.5  |               | 0.18        | 1.00 | 0.30  | 0.13 | 0.5  |               |
| 3  | Chronic obstructive pulmonary disease                  | 0.52          | 0.93 | 0.64  | 0.49 | 6.6  |               | 0.77        | 0.98 | 0.84  | 0.75 | 9.3  |               |
| 4  | Colon and rectum cancer                                | 0.83          | 0.94 | 0.87  | 0.82 | 7.0  |               | 0.97        | 0.89 | 0.93  | 0.97 | 8.6  |               |
| 5  | Diabetes mellitus type 2                               | 0.14          | 0.22 | 0.15  | 0.09 | 2.0  |               | 0.43        | 0.33 | 0.35  | 0.39 | 4.1  |               |
| 6  | Esophageal cancer                                      | 1.00          | 0.80 | 0.89  | 1.00 | 1.1  |               | 1.00        | 0.80 | 0.89  | 1.00 | 1.1  |               |
| 7  | Falls                                                  | 0.09          | 1.00 | 0.16  | 0.03 | 0.2  |               | 0.73        | 0.89 | 0.80  | 0.71 | 2.0  |               |
| 8  | Garbage Code                                           | 1.00          | 0.01 | 0.02  | 1.00 | 31.6 |               | 0.50        | 0.13 | 0.19  | 0.47 | 1.8  |               |
| 9  | Intracerebral hemorrhage                               | 0.56          | 0.96 | 0.68  | 0.53 | 5.7  |               | 0.86        | 0.95 | 0.89  | 0.85 | 8.9  |               |
| 10 | Ischemic heart disease                                 | 0.57          | 0.92 | 0.65  | 0.54 | 11.6 |               | 0.88        | 0.87 | 0.84  | 0.87 | 19.1 |               |
| 11 | Ischemic stroke                                        | 0.34          | 0.91 | 0.46  | 0.30 | 5.2  |               | 0.80        | 0.84 | 0.80  | 0.79 | 13.2 |               |
| 12 | Liver cancer                                           | 0.64          | 1.00 | 0.77  | 0.61 | 3.2  |               | 1.00        | 1.00 | 1.00  | 1.00 | 5.0  |               |
| 13 | Pancreatic cancer                                      | 0.92          | 1.00 | 0.95  | 0.91 | 5.0  |               | 1.00        | 1.00 | 1.00  | 1.00 | 5.5  |               |
| 14 | Prostate cancer                                        | 0.43          | 1.00 | 0.60  | 0.39 | 0.7  |               | 1.00        | 1.00 | 1.00  | 1.00 | 1.6  |               |
| 15 | Stomach cancer                                         | 0.88          | 0.97 | 0.91  | 0.87 | 6.6  |               | 0.97        | 1.00 | 0.98  | 0.97 | 7.0  |               |
| 16 | Tracheal, bronchus, and lung cancer                    | 0.83          | 1.00 | 0.90  | 0.82 | 4.5  |               | 0.96        | 0.96 | 0.96  | 0.96 | 5.5  |               |
| 17 | Others                                                 | 0.60          | 0.11 | 0.17  | 0.58 | 6.4  |               | 0.80        | 0.20 | 0.31  | 0.79 | 4.5  |               |
|    | Average                                                |               |      |       | 0.55 |      | 0.63          |             |      |       | 0.76 | 0.93 |               |

Supplementary Table 6. Validation metrics comparing original UCOD or routine UCOD with MRR UCOD (top 15 specific UCOD) from CHCs

|    | Cause of Death                                         | Original UCOD |      |       |      |      | Routine UCOD  |             |      |       |      |      |               |
|----|--------------------------------------------------------|---------------|------|-------|------|------|---------------|-------------|------|-------|------|------|---------------|
|    |                                                        | Sensitivity   | PPV  | Kappa | CCC  | CSMF | CSMF accuracy | Sensitivity | PPV  | Kappa | CCC  | CSMF | CSMF accuracy |
| 1  | Breast cancer                                          | 1.00          | 1.00 | 1.00  | 1.00 | 1.4  |               | 1.00        | 1.00 | 1.00  | 1.00 | 1.4  |               |
| 2  | Chronic kidney disease due to diabetes mellitus type 2 | 0.75          | 0.75 | 0.75  | 0.73 | 0.7  |               | 0.75        | 1.00 | 0.86  | 0.73 | 0.5  |               |
| 3  | Chronic obstructive pulmonary disease                  | 0.88          | 0.89 | 0.87  | 0.87 | 11.7 |               | 0.94        | 0.94 | 0.93  | 0.94 | 11.9 |               |
| 4  | Colon and rectum cancer                                | 0.96          | 0.96 | 0.95  | 0.95 | 4.1  |               | 0.96        | 0.96 | 0.95  | 0.95 | 4.1  |               |
| 5  | Diabetes mellitus type 2                               | 0.58          | 0.82 | 0.67  | 0.56 | 3.0  |               | 0.67        | 0.94 | 0.77  | 0.65 | 3.0  |               |
| 6  | Esophageal cancer                                      | 0.91          | 1.00 | 0.95  | 0.90 | 1.8  |               | 1.00        | 1.00 | 1.00  | 1.00 | 1.9  |               |
| 7  | Falls                                                  | 0.86          | 1.00 | 0.92  | 0.85 | 1.1  |               | 1.00        | 0.88 | 0.93  | 1.00 | 1.4  |               |
| 8  | Garbage Code                                           | 1.00          | 0.06 | 0.08  | 1.00 | 25.1 |               | 0.63        | 0.45 | 0.52  | 0.60 | 1.9  |               |
| 9  | Intracerebral hemorrhage                               | 0.39          | 0.92 | 0.53  | 0.35 | 2.3  |               | 0.97        | 0.97 | 0.97  | 0.97 | 5.5  |               |
| 10 | Ischemic heart disease                                 | 0.48          | 0.90 | 0.56  | 0.45 | 11.2 |               | 0.83        | 0.94 | 0.86  | 0.82 | 18.6 |               |
| 11 | Ischemic stroke                                        | 0.42          | 0.79 | 0.49  | 0.38 | 8.3  |               | 0.96        | 0.79 | 0.83  | 0.95 | 19.1 |               |
| 12 | Liver cancer                                           | 0.88          | 0.96 | 0.92  | 0.88 | 4.2  |               | 0.96        | 1.00 | 0.98  | 0.96 | 4.4  |               |
| 13 | Pancreatic cancer                                      | 0.92          | 1.00 | 0.95  | 0.91 | 3.9  |               | 0.96        | 1.00 | 0.98  | 0.96 | 4.1  |               |
| 14 | Prostate cancer                                        | 1.00          | 1.00 | 1.00  | 1.00 | 0.9  |               | 1.00        | 1.00 | 1.00  | 1.00 | 0.9  |               |
| 15 | Stomach cancer                                         | 0.97          | 0.97 | 0.97  | 0.97 | 6.7  |               | 0.97        | 0.97 | 0.97  | 0.97 | 6.7  |               |
| 16 | Tracheal, bronchus, and lung cancer                    | 0.95          | 0.99 | 0.96  | 0.94 | 12.7 |               | 0.95        | 0.99 | 0.96  | 0.94 | 12.7 |               |
| 17 | Others                                                 | 0.17          | 0.20 | 0.17  | 0.11 | 0.9  |               | 0.83        | 0.50 | 0.62  | 0.82 | 1.8  |               |
|    | Average                                                |               |      |       | 0.75 |      | 0.76          |             |      |       | 0.85 |      | 0.95          |
